# Supplementary material
Source: PubMed Central journal article supplement (PMC1698693)

**Supplemental figure legend:**

Effect of cycloleucine, SAM or MTA treatment on luciferase activity driven by the human BHMT promoter (**part A**) and cellular SAM levels (**part B**). HepG2 cells transfected transiently with the BHMT promoter construct -347/+33-LUC and treated with cycloleucine (20mM, 2 hr pretreatment) or vehicle control followed by SAM (5mM for 12 hrs) or MTA (1mM for 12 hrs) or vehicle control. Cycloleucine was added back with either SAM or MTA. Cells were co-transfected with Renilla luciferase for control of transfection efficiency. Some cells were processed for SAM level determination as described in Methods. Results represent mean $\pm$ SEM from three (SAM levels) to six (promoter activity) independent experiments performed in triplicates. Promoter activity data is expressed as relative luciferase activity to that of pGL-3 basic vector control, which is assigned a value of 1.0. Cellular SAM levels are expressed as nmol/mg protein. For part A, \*p<0.005 versus control, †p<0.05 versus control and SAM treatment. For part B, \*p<0.05 versus control, †p<0.05 vs. MTA.

**A.**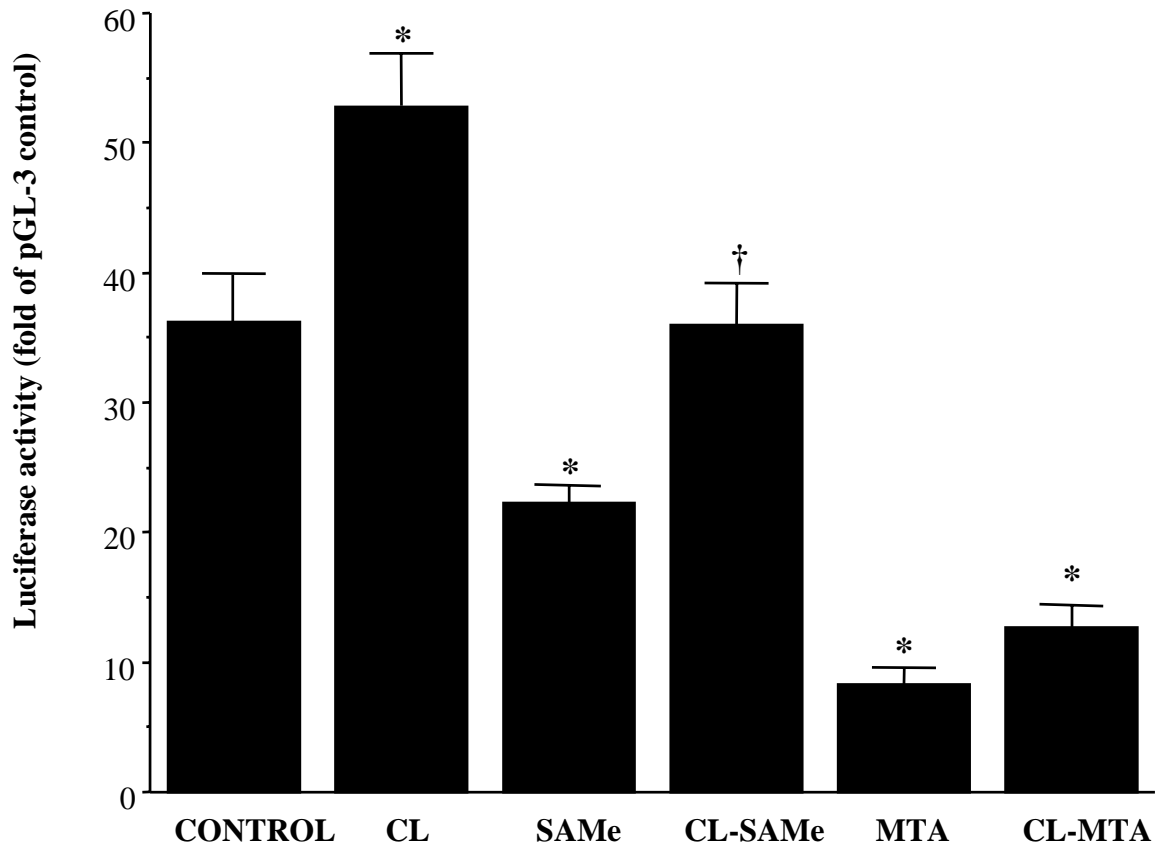**B.**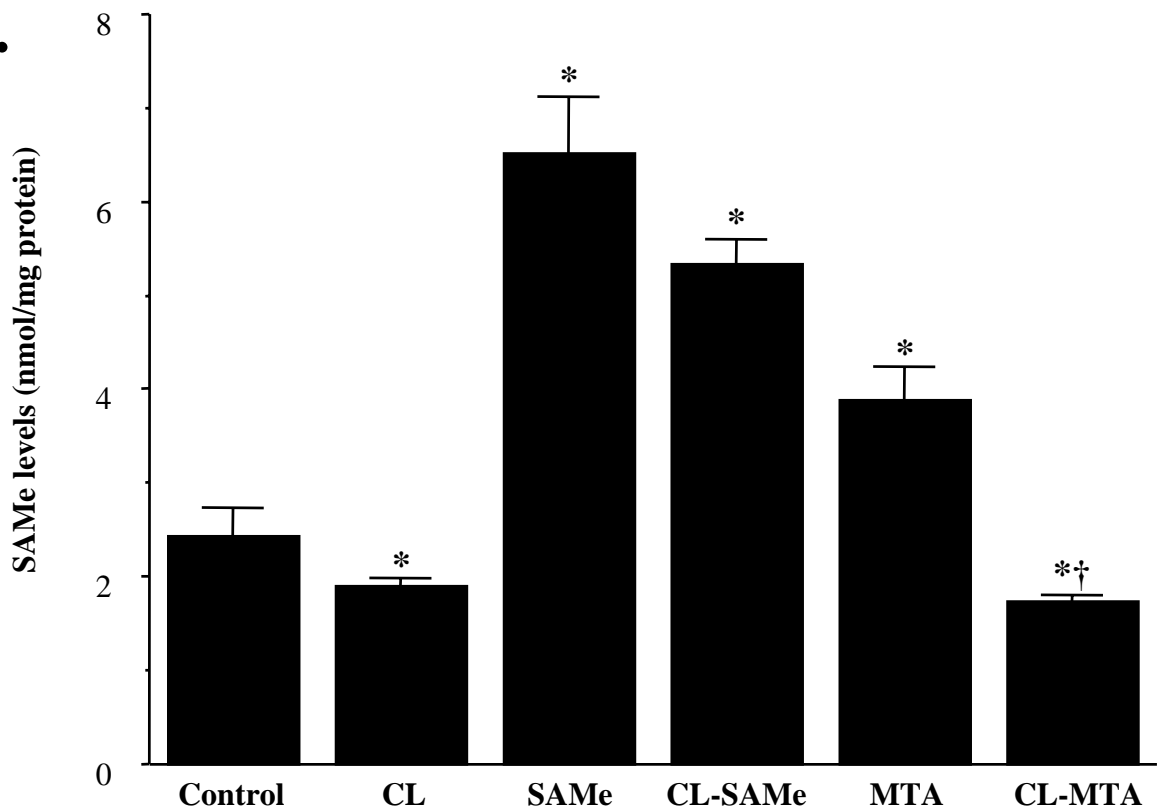

Supplement: bj4010087add.pdf [file bj4010087add.pdf]
